# Supplementary material for: Low-temperature nickel-induced crystallization of amorphous silicon thin films
Source: Research Square preprint supplement (doi:10.21203/rs.3.rs-7248765/v1), 2025-08-28
Supplement: Supplementary file 1 [file ebcf2bdfa44fa23d2f5b244e.docx]

**(b)**

**(a)**

**NiO**

**NiO**

**Glass substrate**

**Glass substrate**

**Glass substrate**

**(d)**

**(c)**

**Glass substrate**

**NiO**

**a-Si : H**


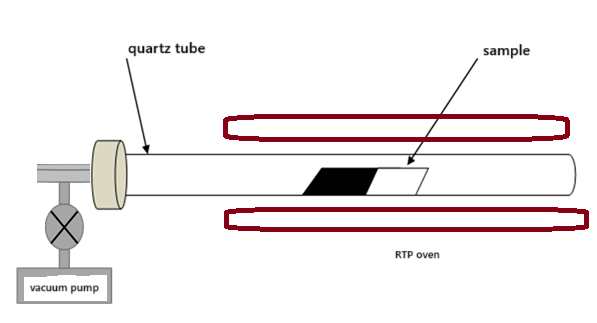


**(e)**

**(f)**

**Glass substrate**

**NiO**

**Poly a-Si**

**Glass substrate**

**NiO**

**a-Si**


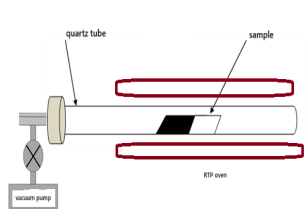


**Figure 1**. Schematic representation of the FET fabrication sequence: (a) Cleaning of Glass Substrates (b) Deposition of NiO thin films by spray pyrolysis on glass substrate (c) Deposition of Hydrogenated Amorphous Silicon (a-Si: H) by PECVD (d) Hydrogen Desorption Process by Rapid Thermal Annealing (RTA) (e) Metal-Induced Crystallization by Rapid Thermal Annealing (RTA)

| Step | Technique | Key Parameters | Purpose |
| --- | --- | --- | --- |
| a. Substrate Cleaning | Standard cleaning | Ultrasonic bath in acetone, rinse with DI water, oven drying at 100 °C for 10 min | Remove surface contaminants |
| b. NiO Deposition | Spray pyrolysis | NiCl₂·6H₂O (0.05–0.1 M), 2–10 ml/min, 350–450 °C, N₂ at 1.5×10⁵ Pa, 15 cm distance | Form p-type NiO layer with controlled thickness |
| c. NiO Post-treatment | Ultrasonic + thermal | Acetone cleaning, DI rinse, oven drying at 100 °C for 10 min | Prepare NiO surface for PECVD deposition |
| d. a-Si:H Deposition | RF-PECVD | 13.56 MHz, 300 °C, 1 Torr, 5 W, 600 s, SiH₄ = 40 sccm, H₂ = 10 sccm | Deposit hydrogenated amorphous silicon layer |
| e. Hydrogen Desorption | Rapid Thermal Annealing | 575 °C, 1 h, vacuum 10⁻⁶ mbar, Argon atmosphere, halogen lamp furnace | Remove hydrogen prior to crystallization |
| f. Metal-Induced Crystallization | Rapid Thermal Annealing | Same as above, duration varied | Transform a-Si:H into polycrystalline silicon |

**Table 1:** Deposition parameters of NiO and Metal-Induced Crystallization (MIC) Process for thin film polycrystalline silicon fabrication from amorphous silicon

**Figure 2.a** Deconvolution of the Raman spectra of NiO/a-Si annealed at 600 °C for 2 hours

**Figure 2.b** Deconvolution of the Raman spectra of NiO/a-Si annealed at 600 °C for 4 hours

**Figure 2.c** Deconvolution of the Raman spectra of NiO/a-Si annealed at 600 °C for 6 hours

**Figure 2.d** Deconvolution of the Raman spectra of NiO/a-Si annealed at 600 °C for 8 hours
